# Supplementary material for: Spectroscopic, Anti-Cancer Activity, and DFT Computational Studies of Pt(II) Complexes with 1-Benzyl-3-phenylthiourea and Phosphine/Diamine Ligands
Source: MDPI journal article supplement (doi:10.3390/inorganics11030125), 2023-03-16
Supplement: s1 [file s1]

Archive with 1 entries (1 files):
- inorganics-2215417-supplementary.pdf
