# Supplementary material for: Spectroscopic, Anti-Cancer Activity, and DFT Computational Studies of Pt(II) Complexes with 1-Benzyl-3-phenylthiourea and Phosphine/Diamine Ligands
Source: MDPI journal article supplement (doi:10.3390/inorganics11030125), 2023-03-16
Supplement: s1 [file s1 › inorganics-2215417-supplementary.pdf]

## Supplementary Information

Figure. S1:  $^1\text{H}$  nmr spectrum of  $\text{H}_2\text{BPT}$  ligand.

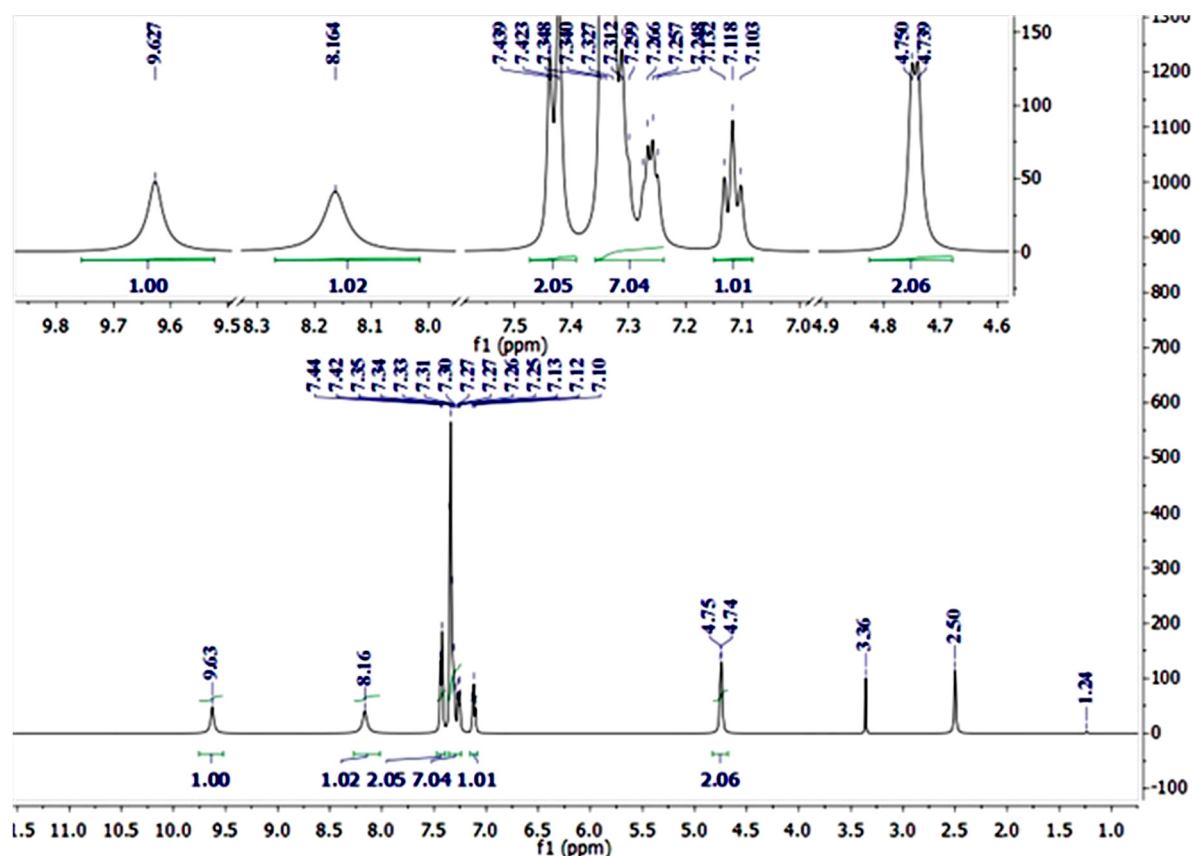

Figure. S2:  $^1\text{H}$  nmr spectrum of complex 1.

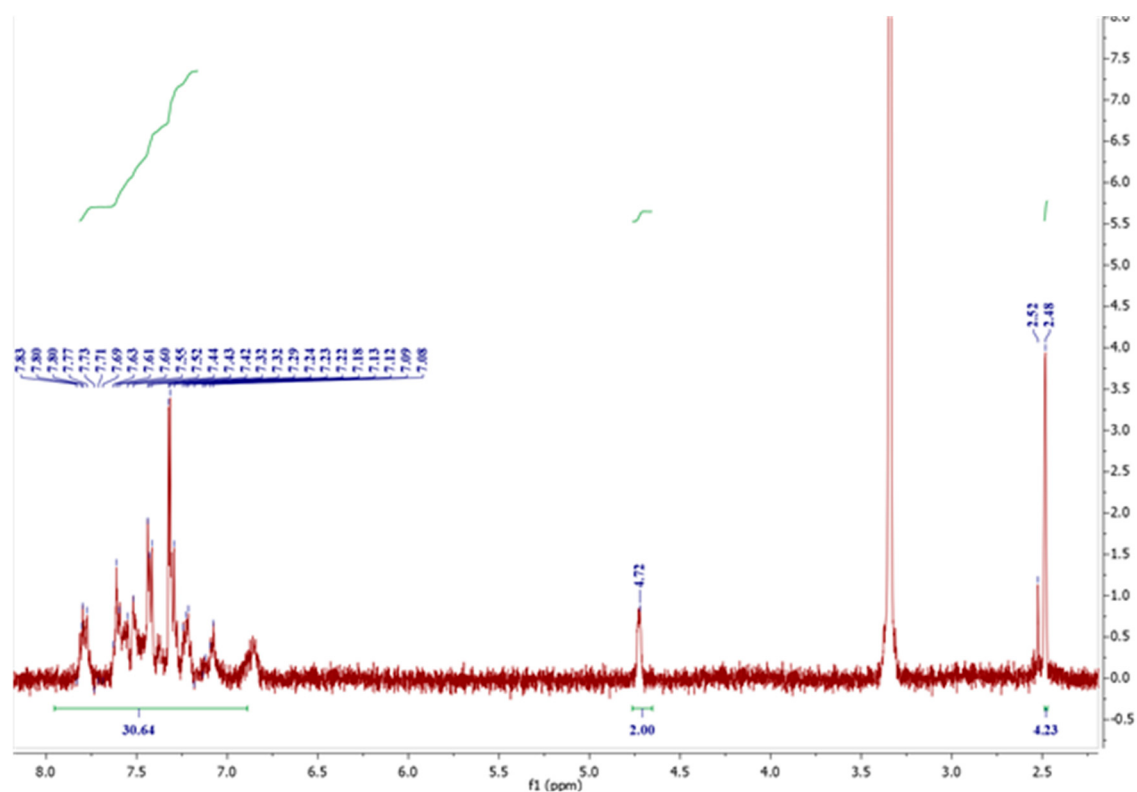

## Supplementary Information

Figure. S3:  $^1\text{H}$  nmr spectrum of complex 2.

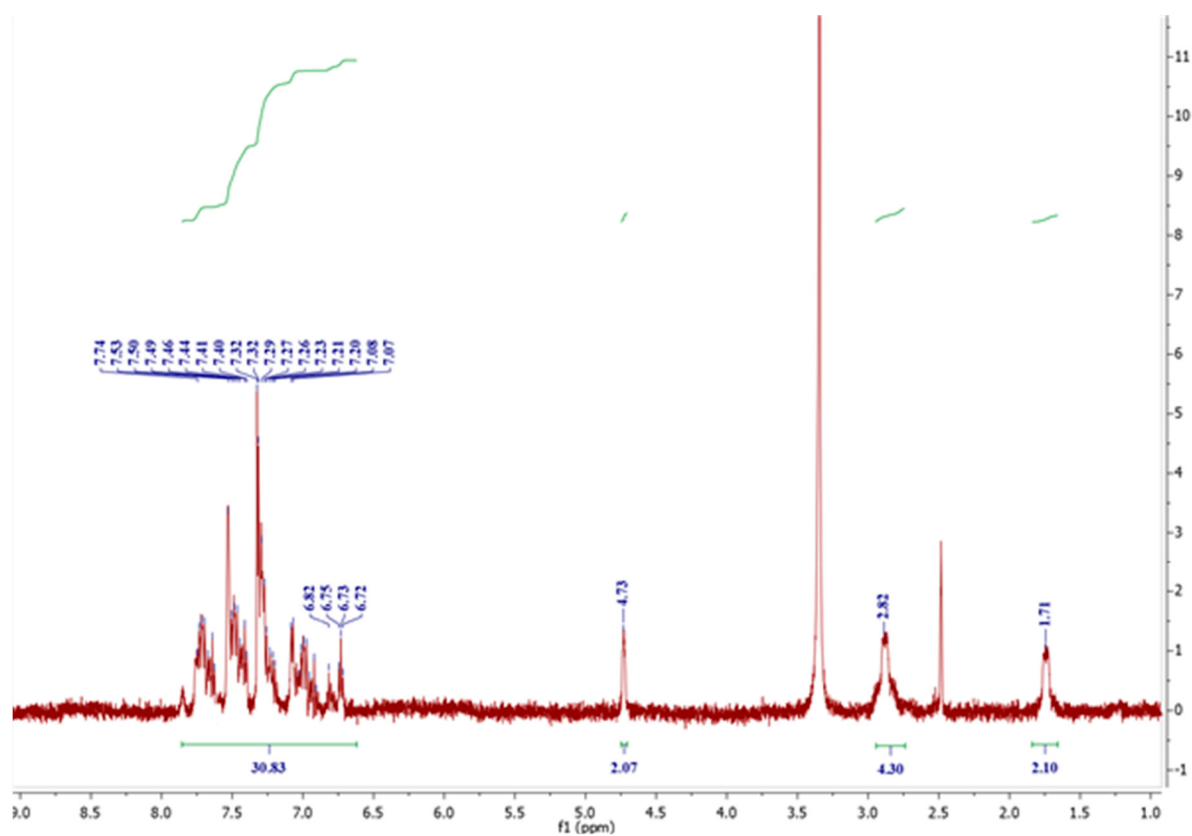

Figure. S4:  $^1\text{H}$  nmr spectrum of complex 3.

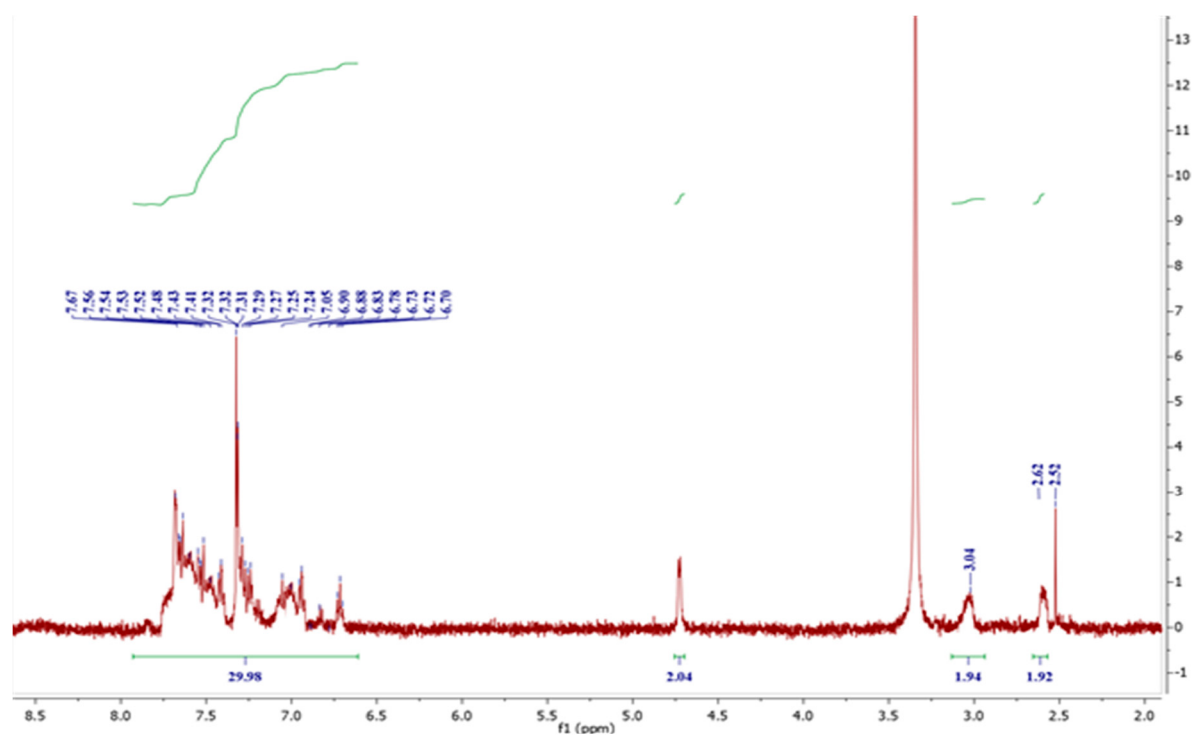

## Supplementary Information

Figure. S5:  $^1\text{H}$  nmr spectrum of complex 4

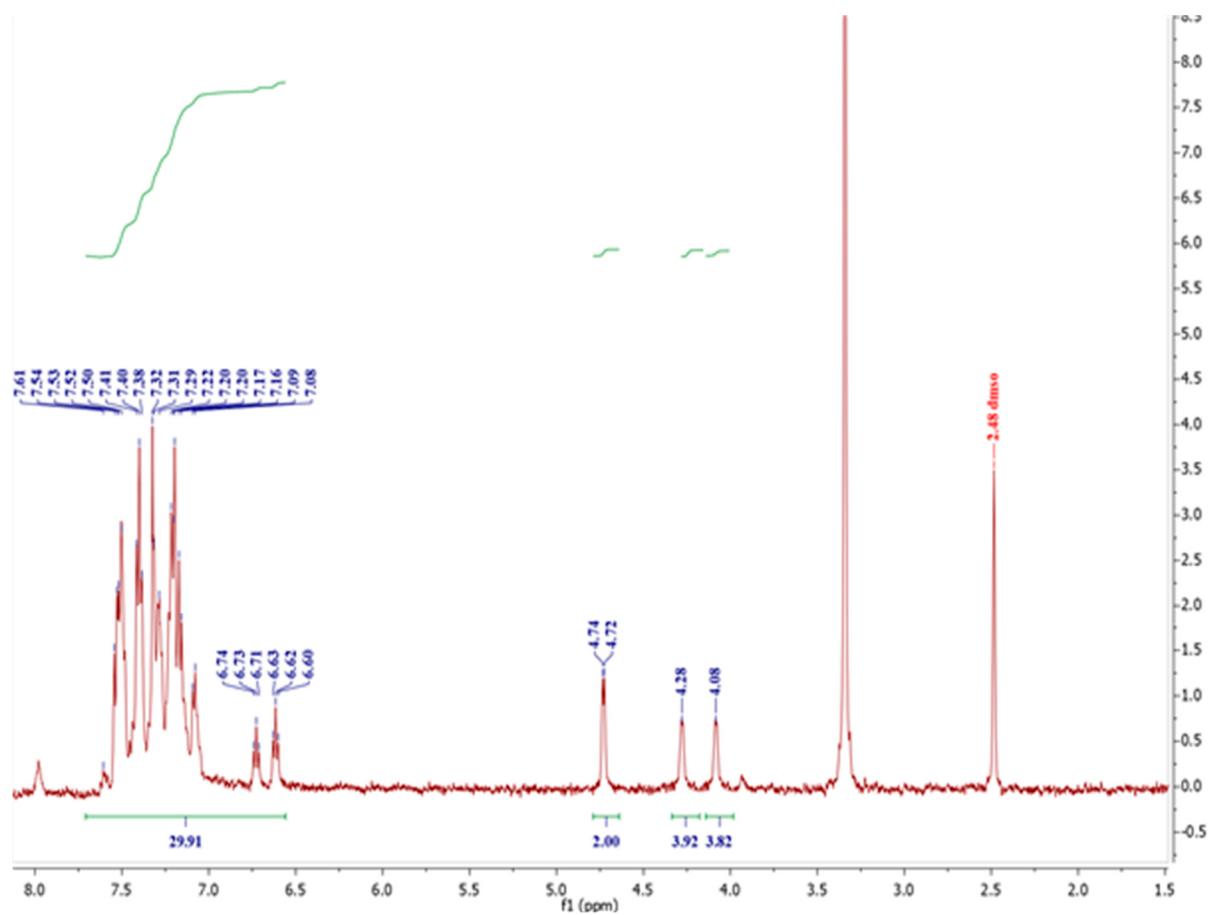

Figure. S6:  $^1\text{H}$  nmr spectrum of complex 5

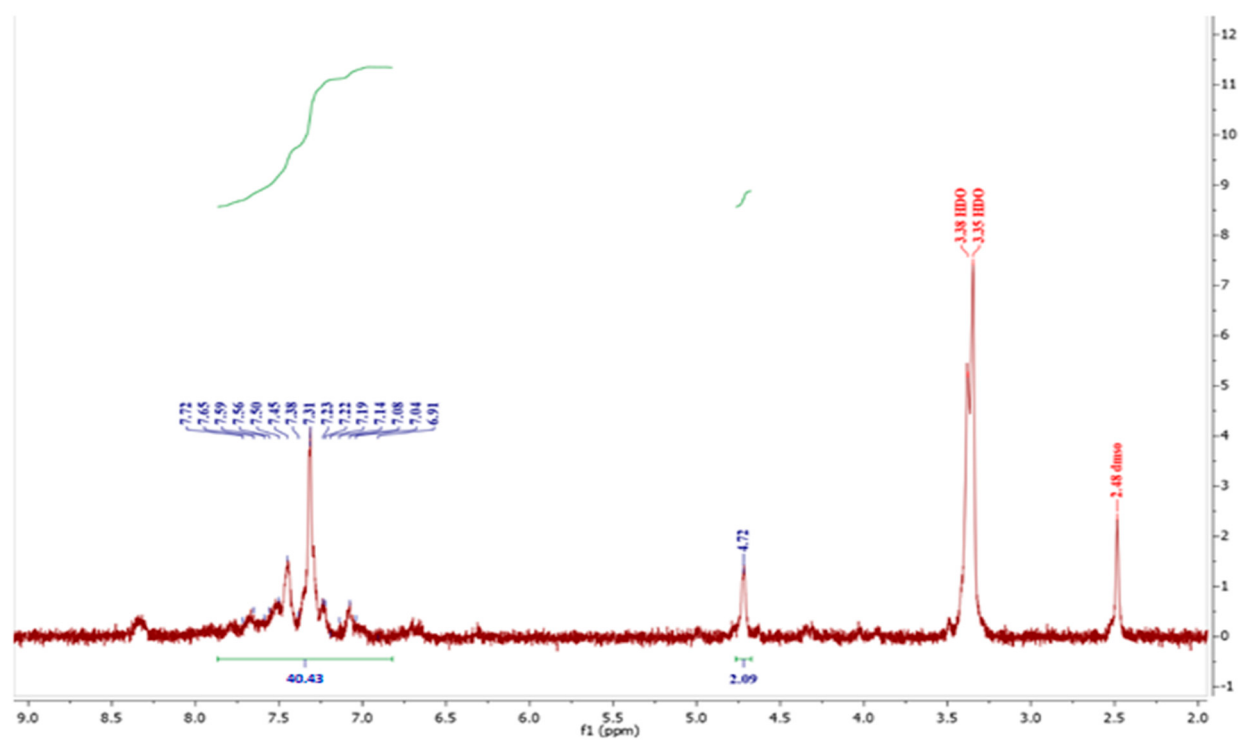

## Supplementary Information

Figure. S7:  $^1\text{H}$  nmr spectrum of complex 6

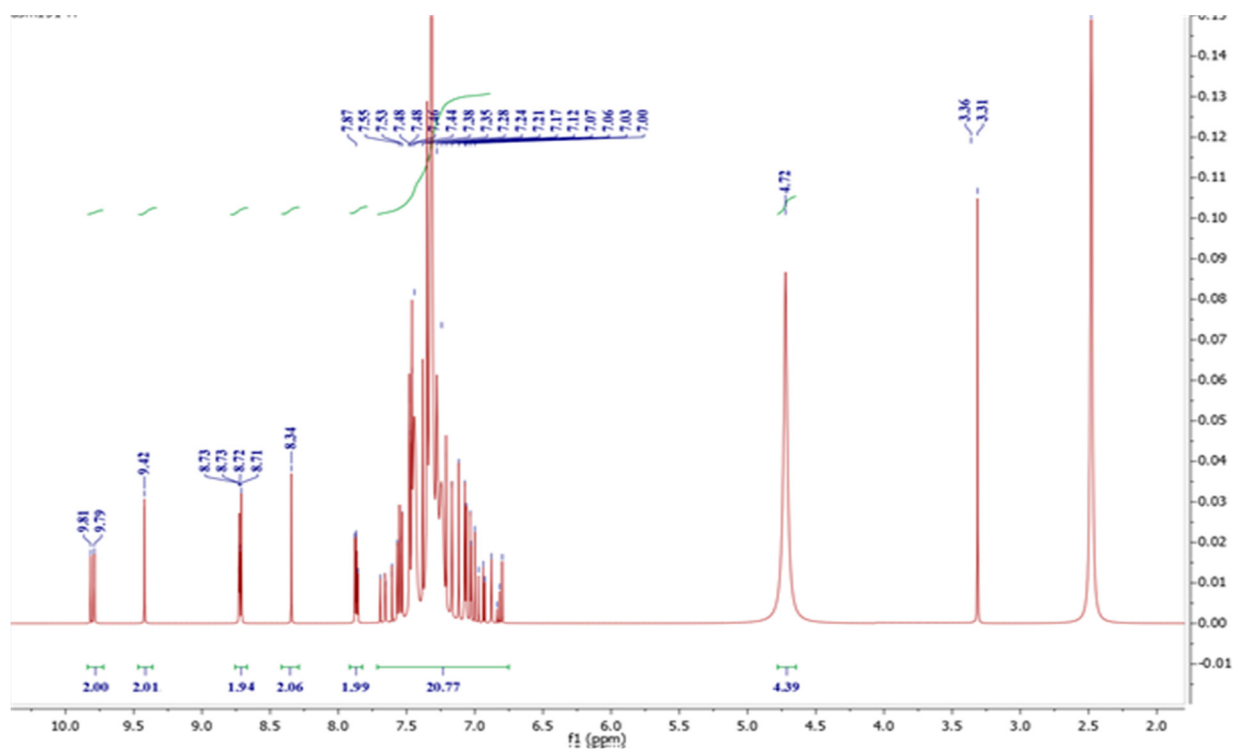

Figure. S8:  $^1\text{H}$  nmr spectrum of complex 7

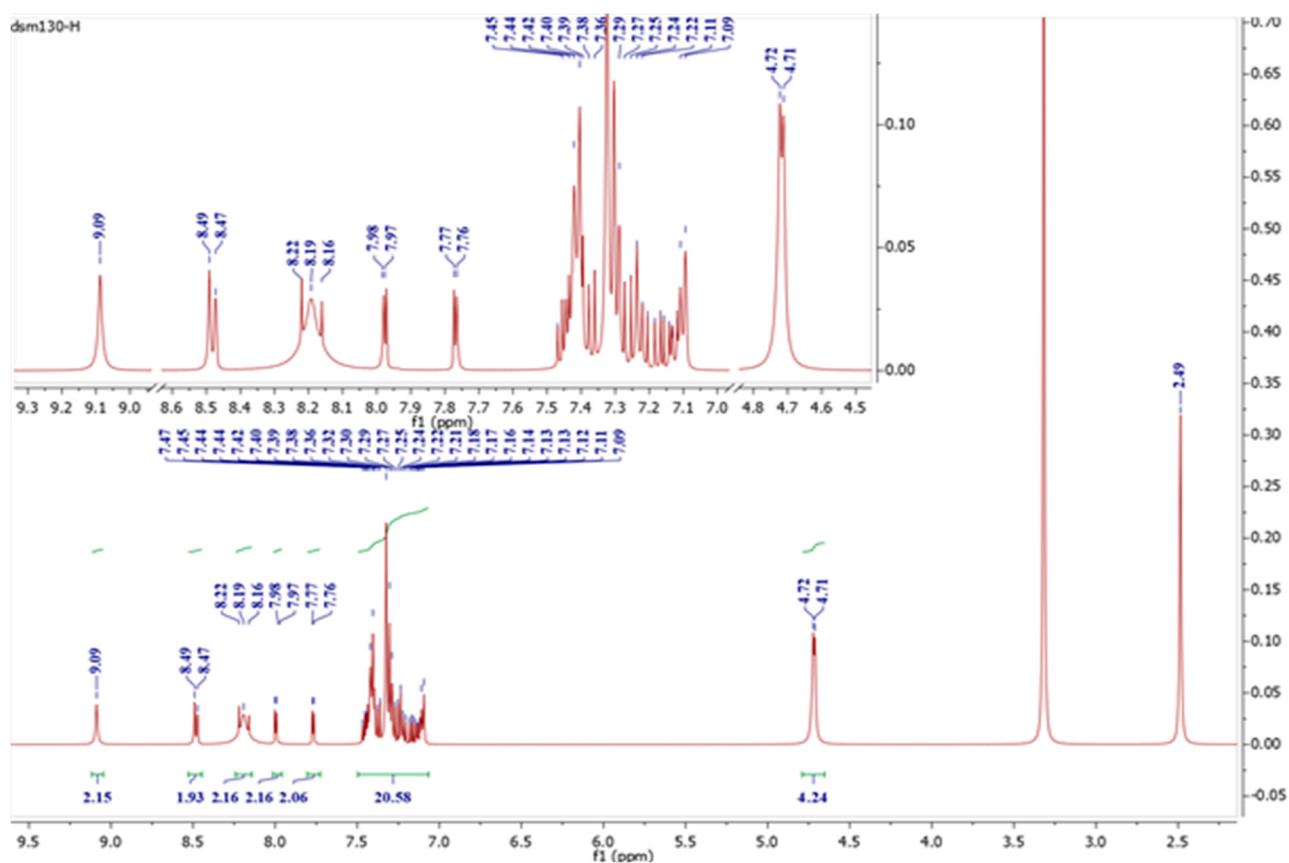

## Supplementary Information

Figure. S9:  $^{31}\text{P}$  nmr spectrum of complex 1

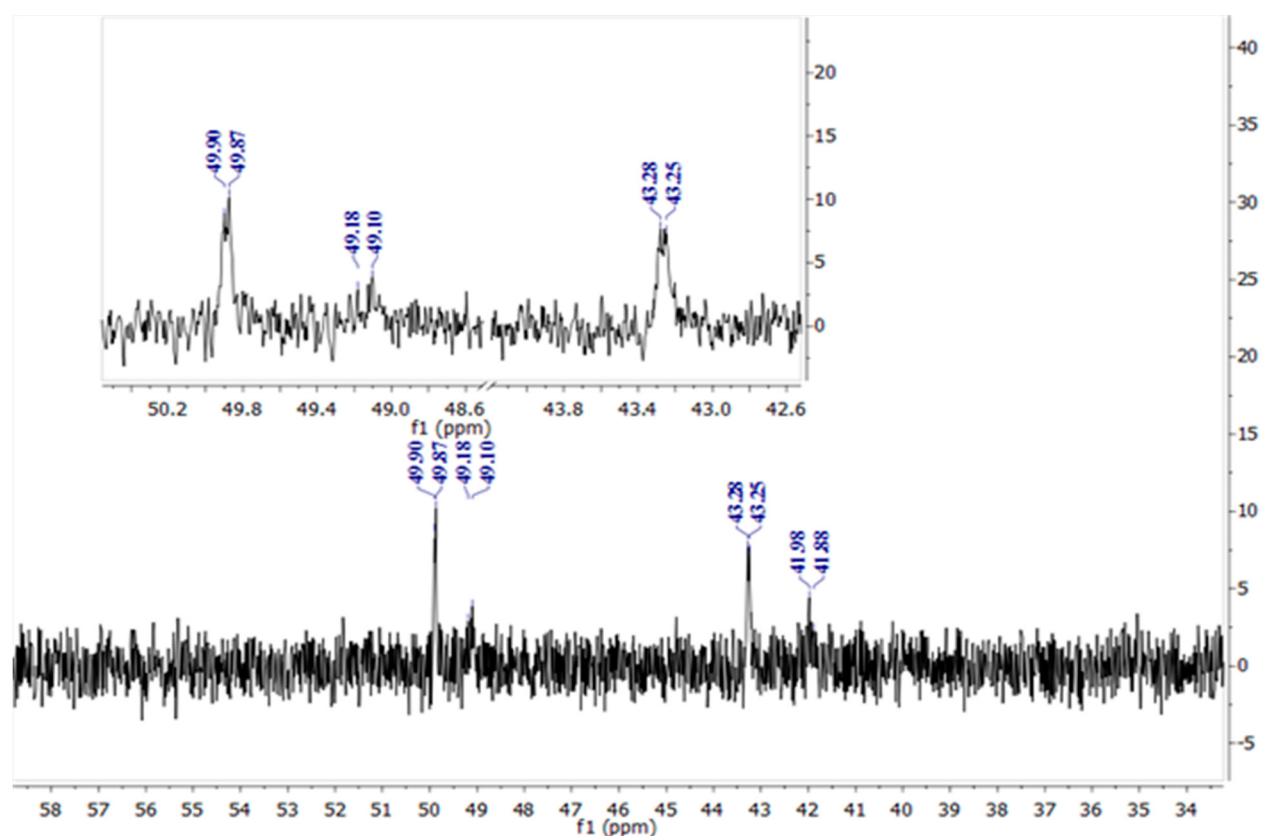

Figure. S10:  $^{31}\text{P}$  nmr spectrum of complex 2

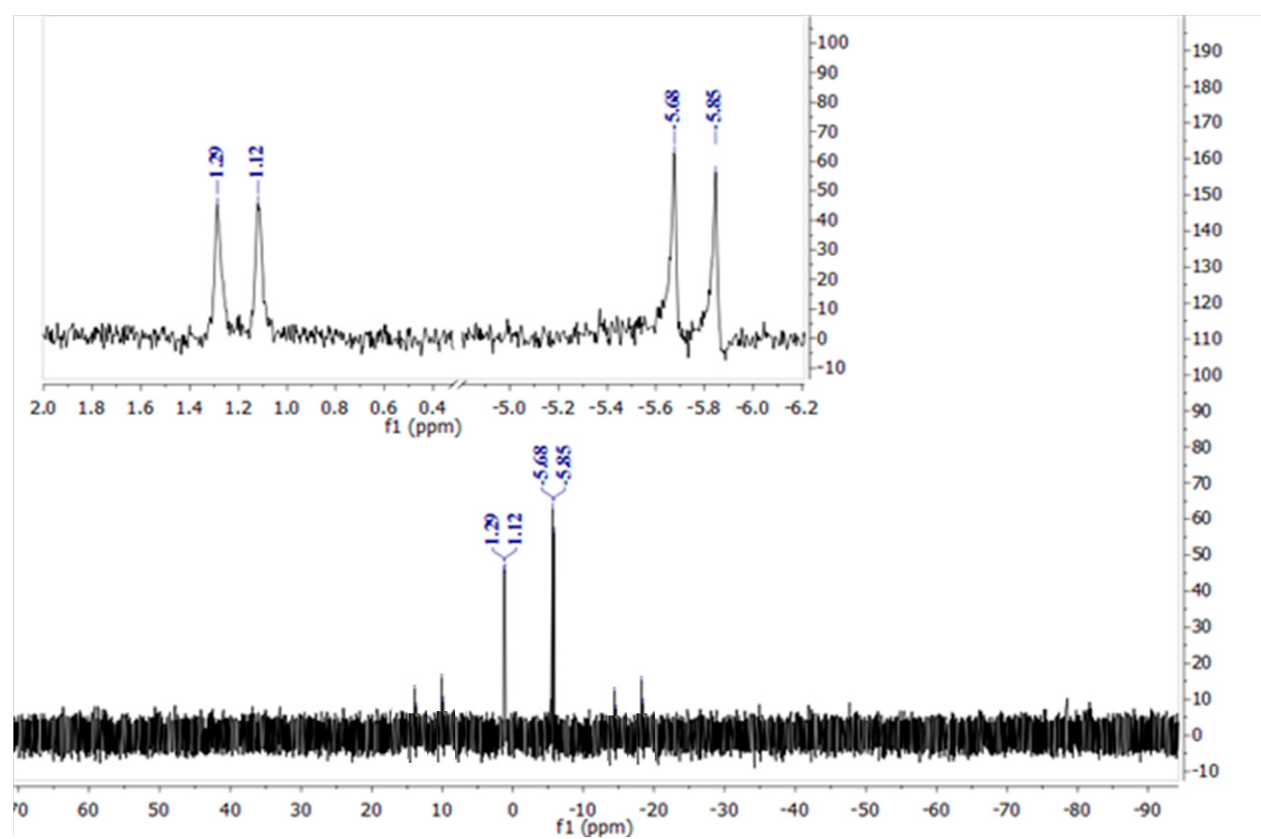

## Supplementary Information

Figure. S11:  $^{31}\text{P}$  nmr spectrum of complex 3

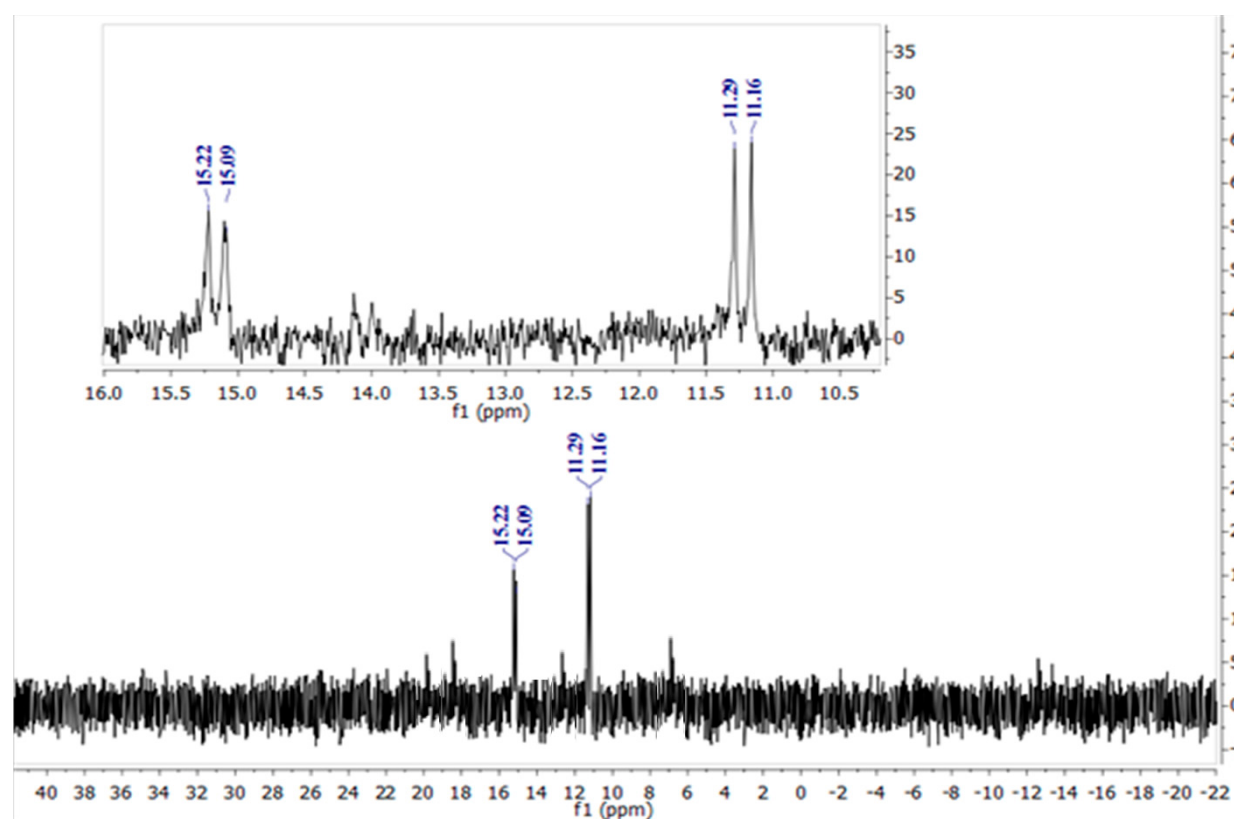

Figure. S12:  $^{31}\text{P}$  nmr spectrum of complex 4

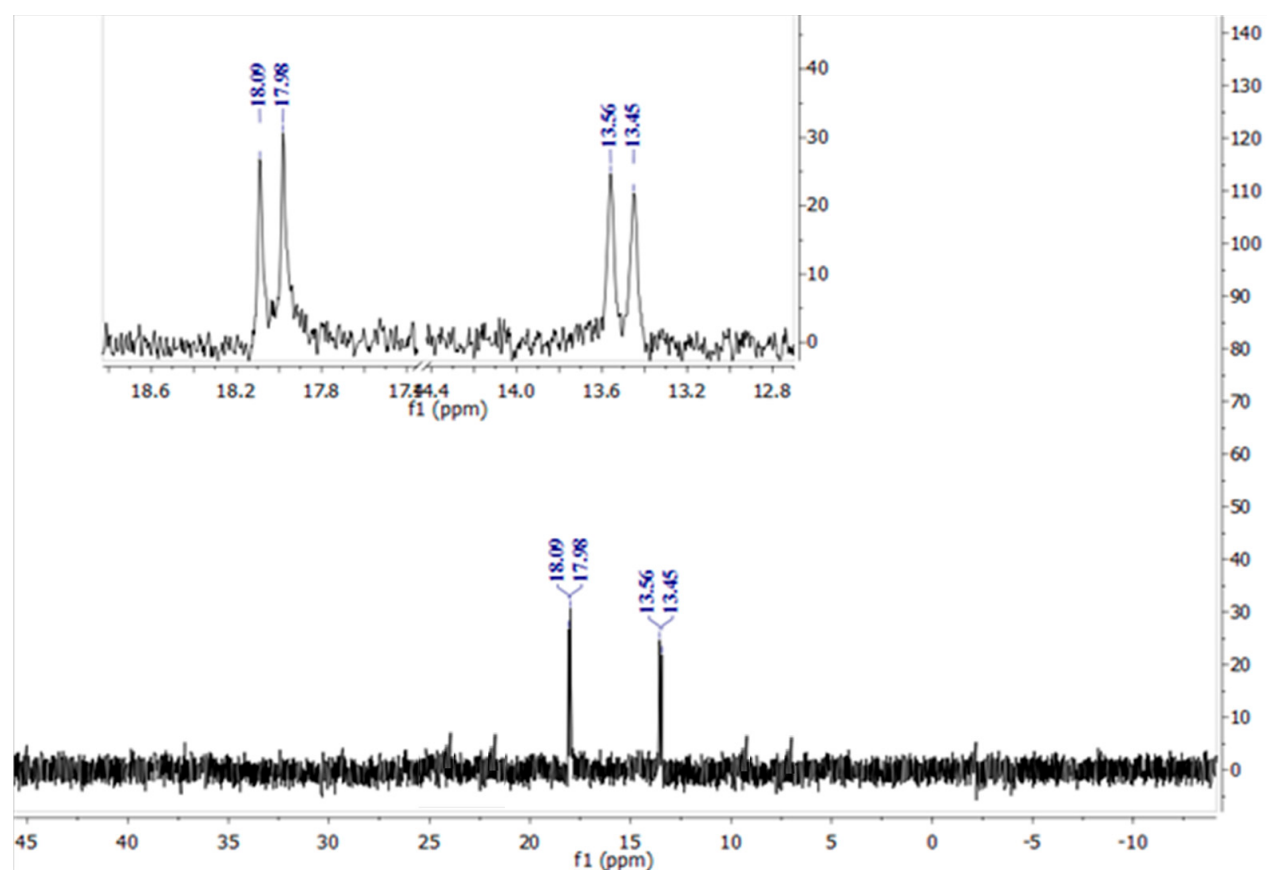

## Supplementary Information

Figure. S13:  $^{31}\text{P}$  nmr spectrum of complex 5

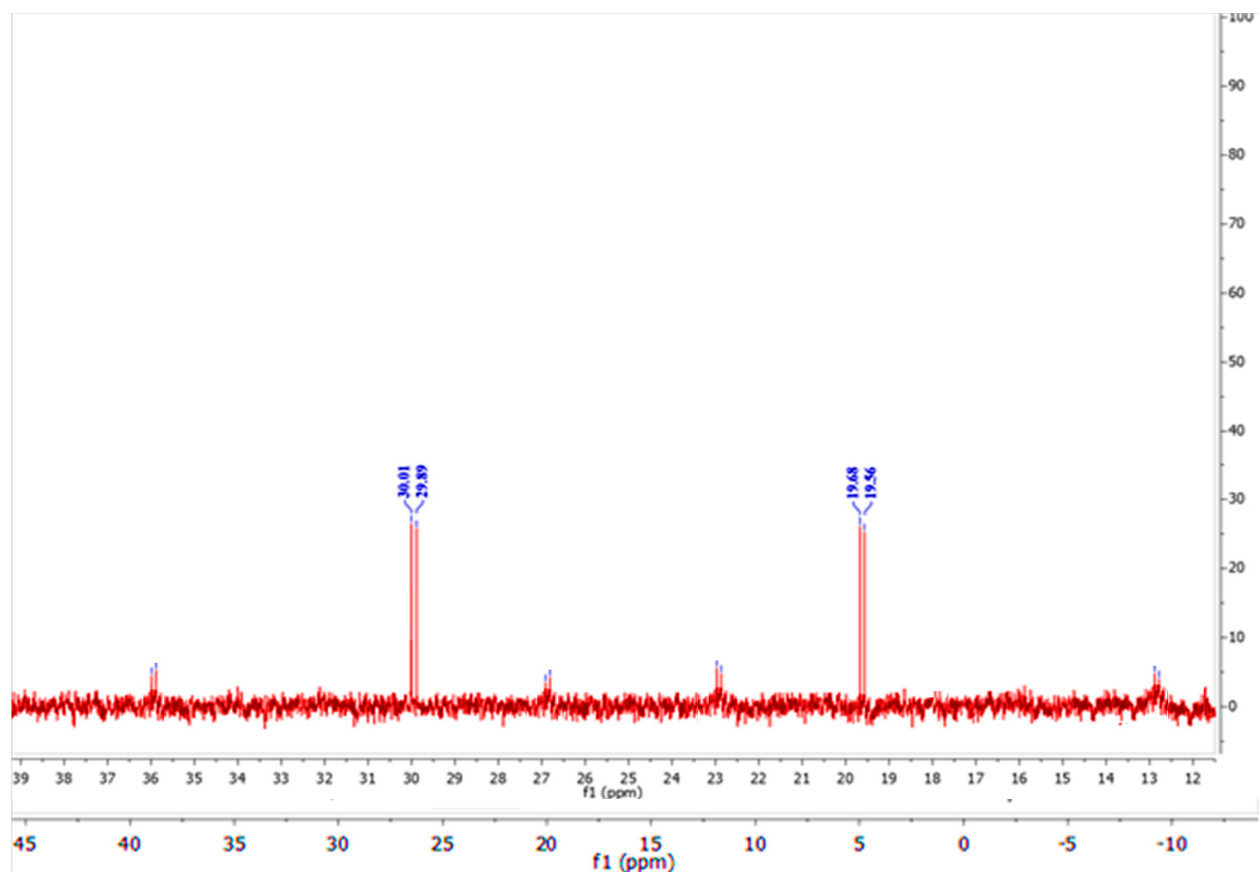

Figure. S14:  $^{13}\text{C}\{-^1\text{H}\}$  nmr spectrum of  $\text{H}_2\text{BPT}$

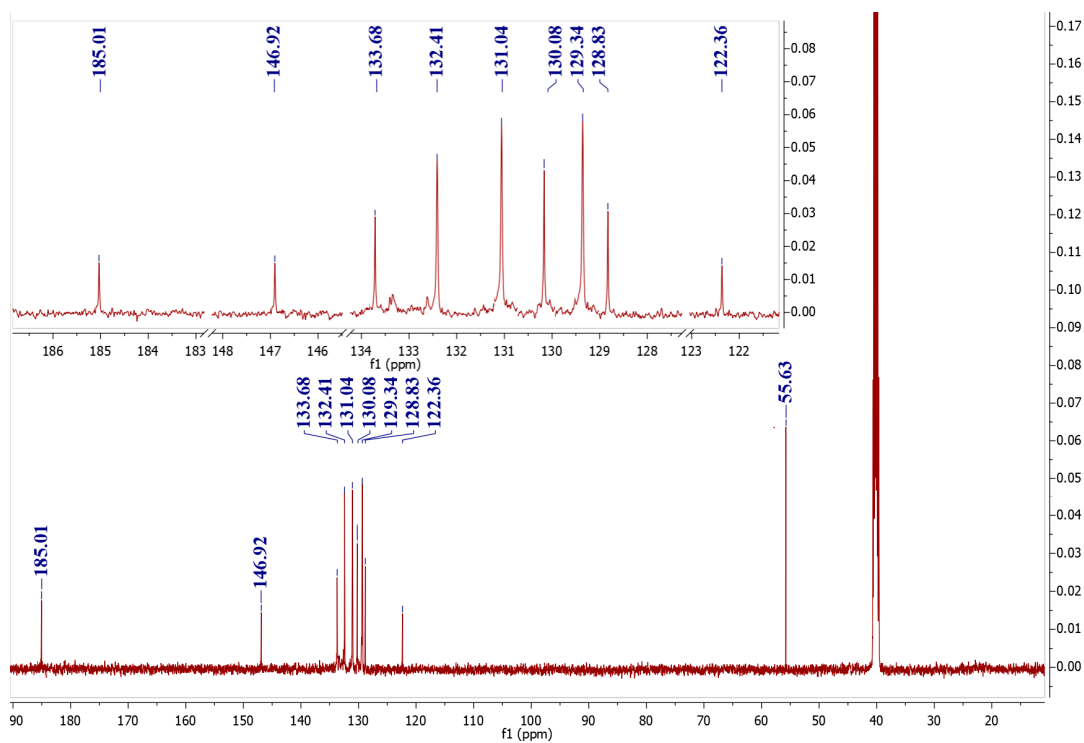

## Supplementary Information

Figure. S15:  $^{13}\text{C}\{-^1\text{H}\}$  nmr spectrum of complex(1)

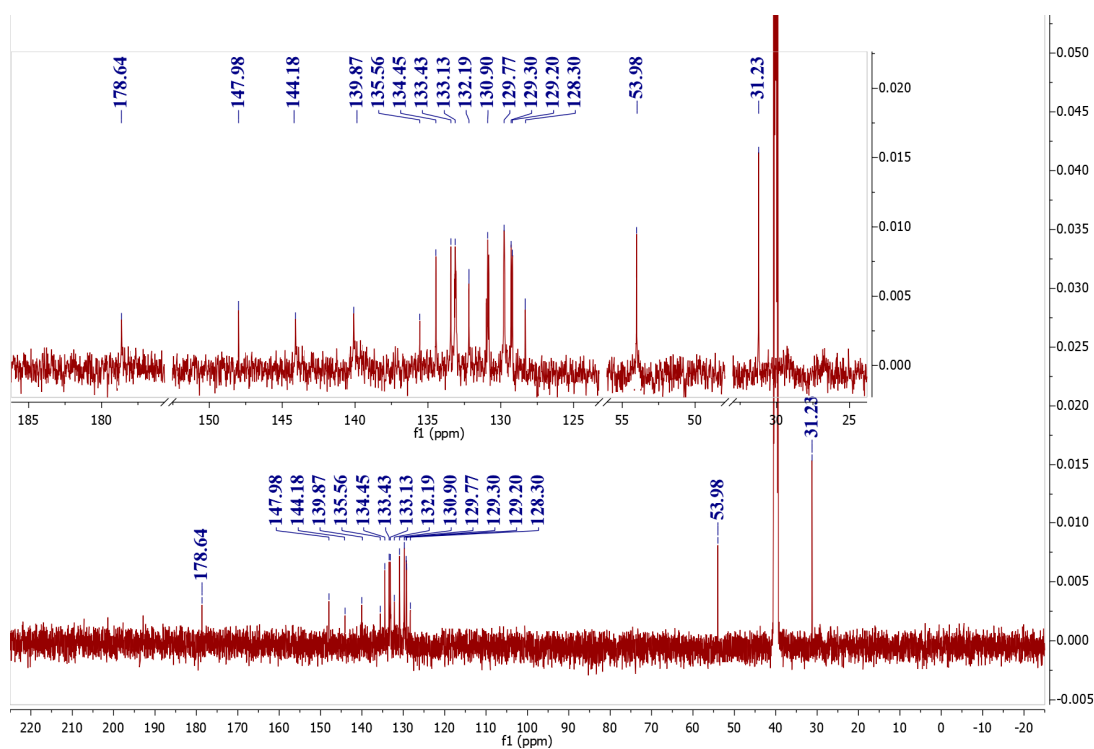

Figure. S16:  $^{13}\text{C}\{-^1\text{H}\}$  nmr spectrum of complex (2)

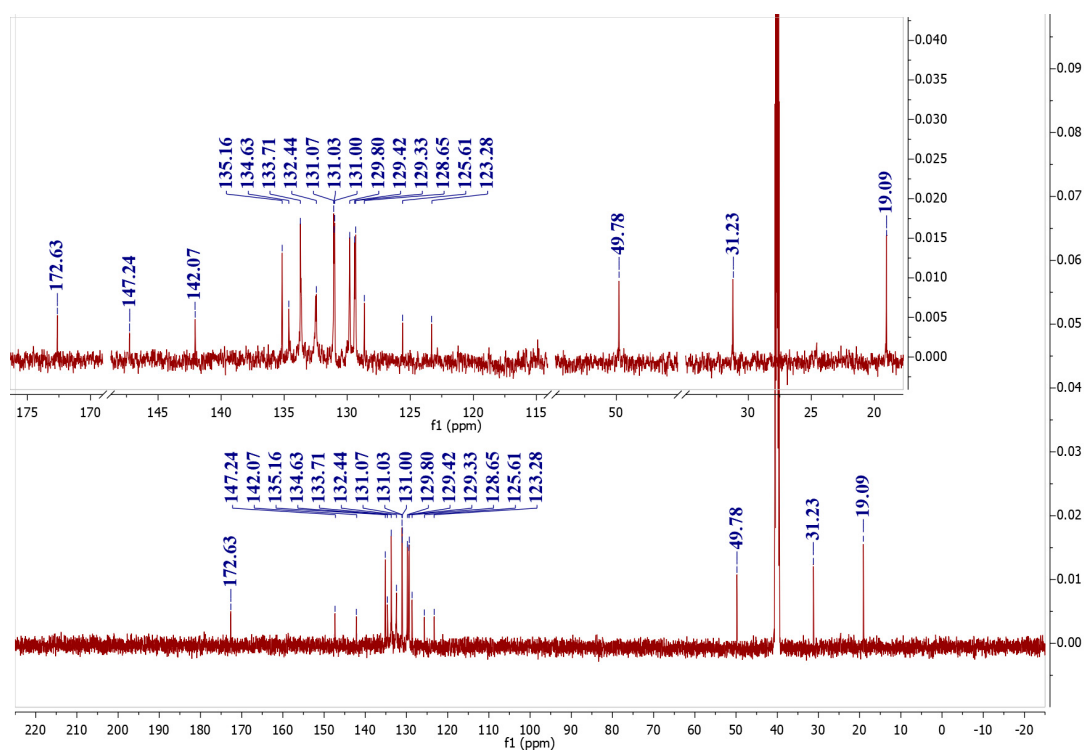

Figure. S17:  $^{13}\text{C}\{-^1\text{H}\}$  nmr spectrum of complex (6)

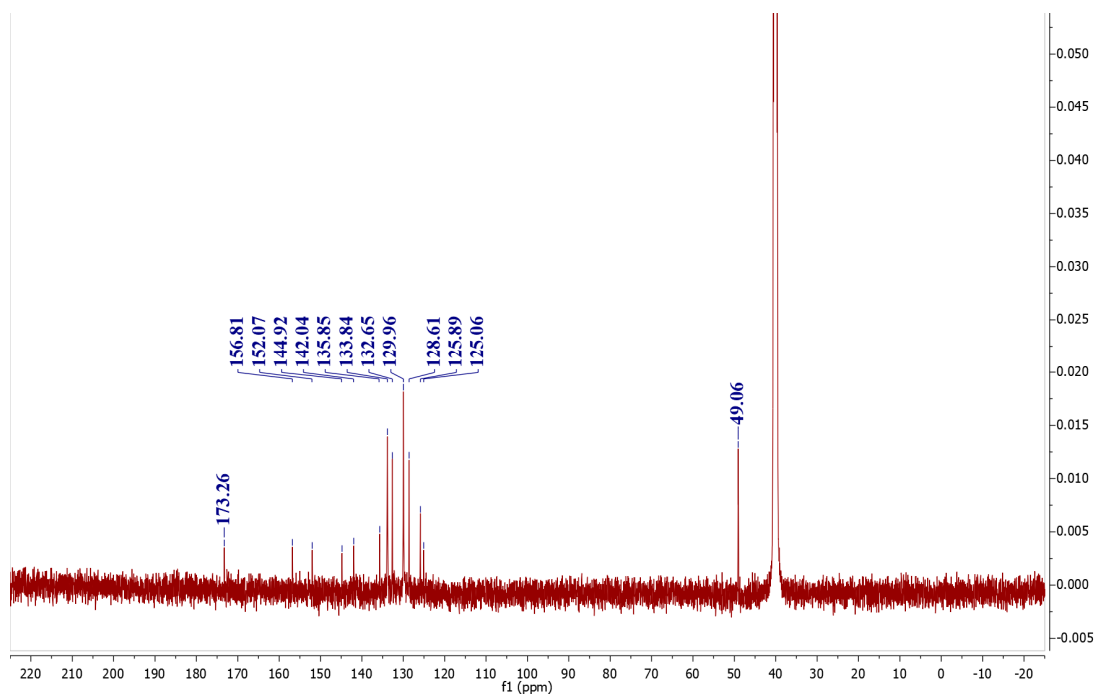

Figure. S18:  $^{13}\text{C}\{-^1\text{H}\}$  nmr spectrum of complex (7)

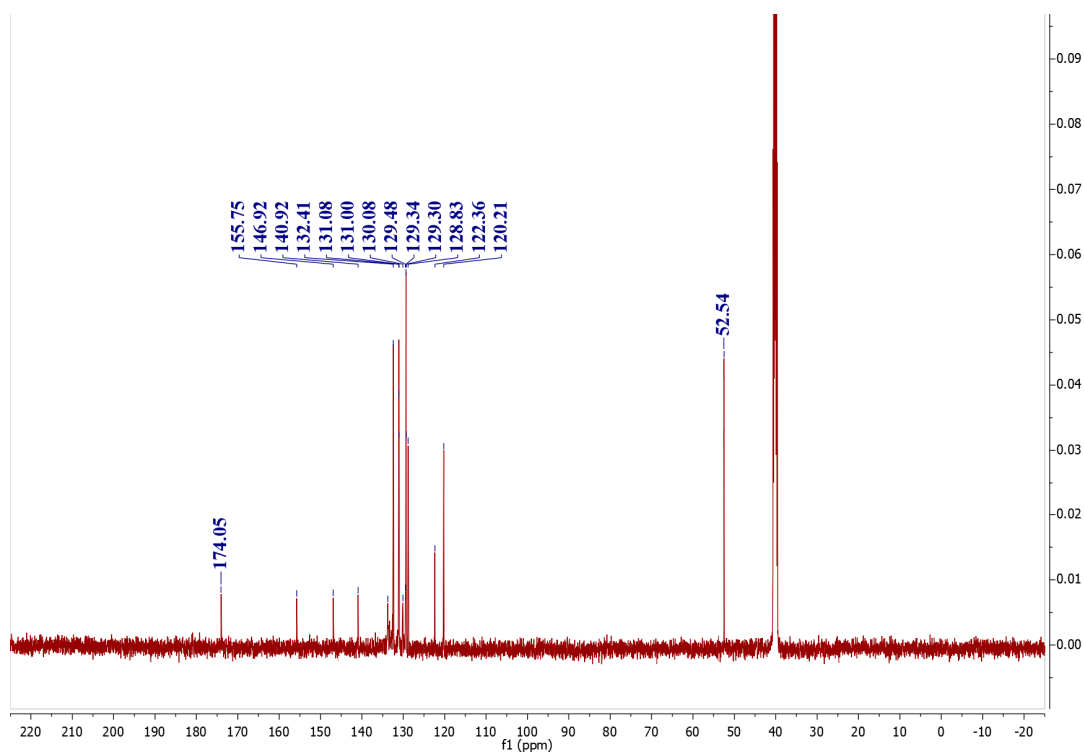

### 1- Instrumentations

The prepared complexes are characterized with the following devices: the melting points are measured using SMP40 device. The molar conductivity is measured using (JENWEAY-Molar Conductivity meter) for a DMSO solution of the prepared complexes with  $10^{-3}$  M at 25 °C . The UV-Vis spectra of the prepared complexes are recorded using Shimadzu, UV-1650 (Pc, UV-Visible Recording Spectrophotometer). DMSO is used as a solvent for the preparation of  $10^{-3}$  M of each complex and the spectrum is recorded at room temperature using the quartz cell (1 cm in width) within the range (200-1100  $\text{cm}^{-1}$ ). The Fourier transform infrared spectra (FTIR) are measured using Shimadzu Fourier Transform Infrared Spectrophotometer FT- IR 8400. The samples are firstly mixed with KBr to prepare KBr-complex disks and then measured in the scale 4000-400  $\text{cm}^{-1}$ . The NMR spectra were recorded (DMSO- $d_6$ ) on a Buker (400 MHz) NMR spectrometer using TMS as an internal standard in DMSO solvent.  $\text{cis-[PtCl}_2(\text{DSMO})_2]$  [1]  $[\text{PtCl}_2(\text{diphos})](\text{diphos} = \text{dppe}, \text{dppp}, \text{dppb}, \text{and dppf})$  [1],  $[\text{PtCl}_2(\text{PPh}_3)_2]$  [1] and  $[\text{PtCl}_2(\text{diamine})](\text{diamine} = \text{Bipy and Phen})$  [2] were prepared by literature methods

### References

- (1) J.H. Price, A.N. Williamson, F. Schramm and B.B. Wayland, Inorg. Chem., (1972) 1275.
- (2) B.H. Abdullah, M.A. Abdulla, S.A. Al-Jibori and T.A.K. Al-Allaf, Asian J. of Chem. 19 (2007) 1334.
